# Supplementary material for: Identification of Compounds That Inhibit Estrogen-Related Receptor Alpha Signaling Using High-Throughput Screening Assays
Source: MDPI journal article supplement (doi:10.3390/molecules24050841), 2019-02-27
Supplement: s1 [file s1]

## Supplemental Material

Identification of compounds that inhibit estrogen-related receptor alpha signaling using high-throughput screening assays

Caitlin Lynch, Jinghua Zhao, Srilatha Sakamuru, Li Zhang, Ruili Huang, Kristine L. Witt, B. Alex Merrick, Christina T. Teng, Menghang Xia

### Table of Contents

#### Tables

|                             |   |
|-----------------------------|---|
| Table S1. Cell Line Details | 2 |
|-----------------------------|---|

#### Figures

|                                         |   |
|-----------------------------------------|---|
| Figure S1. Chemical structure of XCT790 | 3 |
|-----------------------------------------|---|

|                                                                |   |
|----------------------------------------------------------------|---|
| Figure S2. Flow chart of ERR $\alpha$ antagonist determination | 3 |
|----------------------------------------------------------------|---|

|                                                                                                                                         |   |
|-----------------------------------------------------------------------------------------------------------------------------------------|---|
| Figure S3. Concentration response curves, using 15-point dilutions, were acquired on Etoposide using ERR, PGC/ERR, and viability assays | 4 |
|-----------------------------------------------------------------------------------------------------------------------------------------|---|

|                                                                                                                                    |   |
|------------------------------------------------------------------------------------------------------------------------------------|---|
| Figure S4. Concentration response curves, using 15-point dilutions, were acquired on SAHA using ERR, PGC/ERR, and viability assays | 4 |
|------------------------------------------------------------------------------------------------------------------------------------|---|

**Supplementary Table S1.** Cell Line Details

| Name                  | Cell Line  | Target                                              | Assay Readout      | Acquired                               |
|-----------------------|------------|-----------------------------------------------------|--------------------|----------------------------------------|
| AR-HEK293             | HEK293     | Androgen Receptor                                   | Fluorescence       | Life Technologies                      |
| AR-MDA                | MDA-MB-453 | Androgen Receptor                                   | Luminescence       | ATCC                                   |
| Nrf2/ARE-HepG2        | HepG2      | Antioxidant Response Element                        | Fluorescence       | Life Technologies                      |
| CAR-HepG2             | HepG2      | Constitutive Androstane Receptor                    | Luminescence       | Dr. Caitlin Lynch<br>Dr. Hongbing Wang |
| ER-HEK293             | HEK293     | Estrogen Receptor $\alpha$                          | Fluorescence       | Life Technologies                      |
| ER-MCF7               | vMCF7      | Estrogen Receptor $\alpha$                          | Luminescence       | Dr. Michael S. Denison                 |
| ER $\beta$ -HEK293    | HEK293     | Estrogen Receptor $\beta$                           | Fluorescence       | Life Technologies                      |
| ERR-HEK293            | HEK293     | Estrogen-Related Receptor $\alpha$                  | Luminescence       | Dr. Christina T. Teng                  |
| FXR-HEK293            | HEK293     | Farnesoid X Receptor                                | Fluorescence       | Life Technologies                      |
| TRE-GH3               | GH3        | Thyroid Hormone Receptor                            | Luminescence       | Dr. Albertinka J. Murk                 |
| MMP-HepG2             | HepG2      | Mitochondrial Membrane Potential                    | Membrane Potential | ATCC                                   |
| p53-HCT-116           | HCT-116    | p53                                                 | Fluorescence       | Life Technologies                      |
| PGC/ERR-HEK293        | HEK293     | Estrogen-Related Receptor $\alpha$                  | Luminescence       | Dr. Christina T. Teng                  |
| PPAR $\gamma$ -HEK293 | HEK293H    | Peroxisome Proliferator-Activated Receptor $\gamma$ | Fluorescence       | Life Technologies                      |
| PR-HEK293             | HEK293     | Progesterone Receptor                               | Fluorescence       | Life Technologies                      |
| RAR-C3H10T1/2         | C3H10T1/2  | Retinoic Acid Receptor                              | Luminescence       | Dr. Yanling Chen<br>Dr. David H. Reese |
| ROR $\gamma$ -CHO     | CHO        | Retinoic Acid-Related Orphan Receptor $\gamma$      | Luminescence       | Dr. Anton M. Jetten                    |
| ShhGli1-3T3           | NIH3T3     | Sonic Hedgehog Pathway                              | Luminescence       | Dr. Yanling Chen<br>Dr. David H. Reese |

## Supplementary Figures

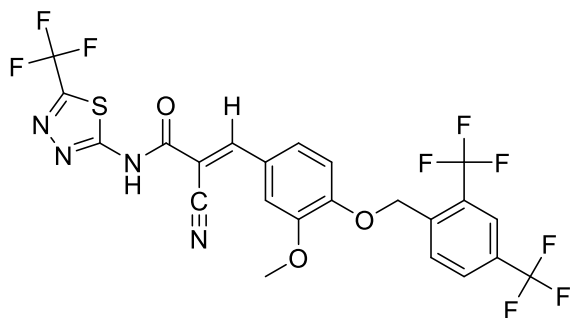

**Figure S1.** Chemical structure of XCT790.

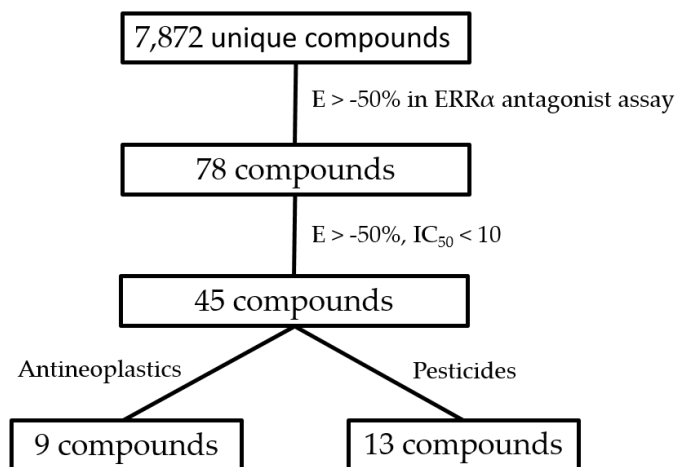

**Figure S2.** Flow chart of ERRα antagonist determination.

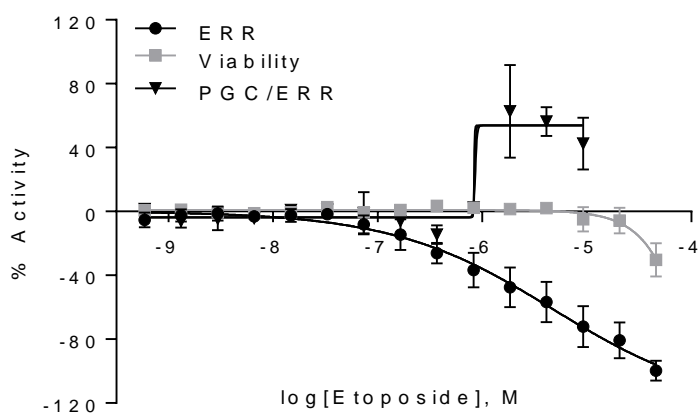

**Figure S2.** Concentration response curves, using 15-point dilutions, were acquired on Etoposide using ERR, PGC/ERR, and viability assays. The positive controls for each assay were made equal to 100%, and etoposide's data was compared to these numbers. Data were collected from the primary screenings and expressed as mean  $\pm$  SD from triplicate experiments.

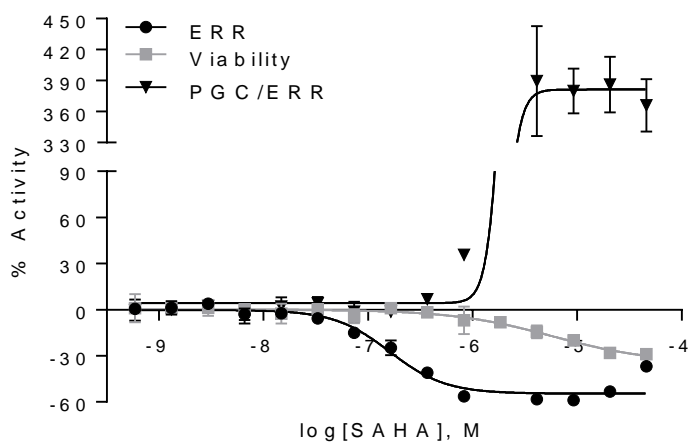

**Figure S3.** Concentration response curves, using 15-point dilutions, were acquired on SAHA using ERR, PGC/ERR, and viability assays. The positive controls for each assay were made equal to 100%, and SAHA's data was compared to these numbers. Data were collected from the primary screenings and expressed as mean  $\pm$  SD from triplicate experiments.
